# Supplementary material for: Heat of capillary condensation in nanopores: new insights from the equation of state
Source: Royal Society of Chemistry journal article supplement (doi:10.1039/c6cp07814a), 2017-01-01
Supplement: c6cp07814a1.pdf [file c6cp07814a1.pdf]

# Electronic Supplementary Information

## Heat of capillary condensation in nanopores: New insights from equation of state

*Sugata P. Tan,\* Mohammad Piri*

Department of Chemical and Petroleum Engineering, University of Wyoming, Laramie, WY 82071

\*Corresponding author: [sptan@uwyo.edu](mailto:sptan@uwyo.edu)

Parachors were correlated according to:

$$\varrho = \sum_{k=1}^{10} p_k \left( {}^{10}\log(T_C - T) \right)^{k-1} \quad (\text{S1})$$

where  $T_C$  is the critical point and  $p_k$  is the correlation coefficients fitted to the data of surface tension up to temperatures close to the critical point. The data used for most fluids are taken from NIST webbook [1], except for acetone, which was taken from Vargaftik [2]. Table S1 contains the coefficients  $p_k$  for all fluids used in paper. The parachor in Eq (S1) has the unit of  $[\text{dn}^{\frac{1}{4}} \text{cm}^{\frac{11}{4}} / \text{mol}]$ .

**Table S1.** Coefficients  $p_k$  of Eq (S1) and the critical point  $T_C$  in [K]

|          | Argon     | N <sub>2</sub> | O <sub>2</sub> | CO <sub>2</sub> | H <sub>2</sub> O | pentane    | hexane     | acetone    |
|----------|-----------|----------------|----------------|-----------------|------------------|------------|------------|------------|
| $p_1$    | 61.091743 | 68.495557      | 63.520438      | 85.580976       | 59.876347        | 262.293739 | 389.326093 | 131.260641 |
| $p_2$    | -5.159504 | -6.245909      | -7.114718      | -5.241881       | -5.48561         | -29.983511 | -200.30909 | 36.100545  |
| $p_3$    | -0.201051 | -0.770175      | 0.016529       | -0.818488       | -1.461685        | 26.247637  | 84.015175  | -9.747544  |
| $p_4$    | -0.391738 | 0.854315       | -1.094663      | 0.087605        | 7.058836         | -22.764271 | 38.57336   | 0          |
| $p_5$    | 0.341847  | -0.397066      | 2.092429       | 0.113607        | -2.969046        | 8.070634   | -17.300689 | 0          |
| $p_6$    | 0.050105  | -0.228211      | -0.698482      | 0.085272        | -6.122237        | -5.845499  | -51.945727 | 0          |
| $p_7$    | 0.086816  | 0.641969       | -1.001154      | 0               | 6.91992          | 10.708881  | 61.164811  | 0          |
| $p_8$    | -0.037114 | -0.206024      | 1.013343       | 0               | -2.615132        | -8.674332  | -30.463338 | 0          |
| $p_9$    | 0         | 0              | -0.249607      | 0               | 0.344466         | 3.179411   | 7.72089    | 0          |
| $p_{10}$ | 0         | 0              | 0              | 0               | 0                | -0.441403  | -0.817504  | 0          |
| $T_C$    | 150.687   | 126.192        | 154.581        | 304.1282        | 647.096          | 469.7      | 507.82     | 508        |

Due to the change in the parachor correlations, the parameter  $\lambda$  is refitted as:

$$\lambda = \sum_{i=0}^3 \sum_{j=0}^2 b_{ij} T^i r_p^{j-1} \quad (\text{S2})$$

The coefficients  $b_{ij}$  are listed in Tables S2 and S3 for all confined fluids used in this paper. If not listed in the tables,  $b_{ij} = 0$ . The listed references contain the experimental capillary-condensation pressure from which the parameter  $\lambda$  is derived.

**Table S2.** Coefficients  $b_{ij}$  of Eq (S2) for fluids in a single size pores.

|          | 2.2-nm MCM-41 (for pentane: $r_p = 2.285$ nm) |                |                |                 |           |           | 1.6-nm MCM-48 |           |
|----------|-----------------------------------------------|----------------|----------------|-----------------|-----------|-----------|---------------|-----------|
|          | Argon                                         | N <sub>2</sub> | O <sub>2</sub> | CO <sub>2</sub> | pentane   | hexane    | hexane        | acetone   |
| $b_{01}$ | 0.192918                                      | 2.810056       | 3.893866       | -0.415885       | 0.0517499 | 1.3188768 | -1.909683     | 0.299824  |
| $b_{11}$ | 0.002054                                      | -0.078271      | -0.097196      | 0.0039051       | 0.0010137 | -0.006387 | 0.010616      | -3.934E-4 |
| $b_{21}$ | 2.1913E-5                                     | 8.7502E-4      | 8.7956E-4      | 2.4675E-6       | 2.14E-6   | 1.1341E-5 | -9.6219E-6    | 3.4876E-6 |
| $b_{31}$ | 0                                             | -2.9196E-6     | -2.4058E-6     | 0               | 0         | 0         | 0             | 0         |
| Ref      | [3]                                           | [3]            | [3]            | [3]             | [4]       | [5]       | [6]           | [6]       |

**Table S3.** Coefficients  $b_{ij}$  of Eq (S2) for fluids in multiple size pores.

|          | MCM-41 87 K | SBA-15         | MCM-41 298.2 K   |
|----------|-------------|----------------|------------------|
|          | Argon       | N <sub>2</sub> | H <sub>2</sub> O |
| $b_{00}$ | 2.71417424  | 0              | 1.025            |
| $b_{10}$ | -0.018012   | 0              | -0.001584        |
| $b_{20}$ | 0           | 0              | 0                |
| $b_{01}$ | -1.482267   | -2.4818556     | -1.5735          |
| $b_{11}$ | 0.016473    | 0.05898146     | 0.003977         |
| $b_{21}$ | 0           | -0.0002487     | 0                |
| $b_{02}$ | 0           | 0.98629802     | 0                |
| $b_{12}$ | 0           | -0.0220987     | 0                |
| $b_{22}$ | 0           | 0.00011318     | 0                |
| Ref      | [7]         | [8]            | [9]              |

## References

- [1] NIST Webbook: Thermophysical Properties of Fluid Systems, <http://webbook.nist.gov/chemistry/fluid/>, (accessed Sept. 2016).
- [2] N. B. Vargaftik, *Tables on the thermophysical properties of liquids and gases: in normal and dissociated states*, Hemisphere Pub. Corp., Washington, 1975.
- [3] K. Morishige and Y. Nakamura, *Langmuir*, 2004, **20**, 4503.
- [4] P.A. Russo, M.M.L.R. Carrott and P.J.M. Carrott, *Micropor. Mesopor. Mater.*, 2012, **151**, 223.
- [5] P. Trens, P., N. Tanchoux, P.M. Papineschi, D. Maldonado, F. Di Renzo and F. Fajula, *Micropor. Mesopor. Mater.* 2005, **86**, 354.
- [6] J.W. Lee, W.G. Shim, M.S. Yang and H. Moon, *J. Chem. Eng. Data*, 2004, **49**, 502.
- [7] M. Kruk and M. Jaroniec, *Chem. Mater.*, 2000, **12**, 222.
- [8] K. Morishige and M. Ito, *J. Chem. Phys.*, 2002, **117**, 8036.
- [9] S. Kittaka, S. Ishimaru, M. Kuranishi, T. Matsuda and T. Yamaguchi, *Phys. Chem. Chem. Phys.*, 2006, **8**, 3223.
